# Supplementary material for: The functional dissection of the plasma corona of SiO2-NPs spots histidine rich glycoprotein as a major player able to hamper nanoparticle capture by macrophages
Source: Royal Society of Chemistry journal article supplement (doi:10.1039/c5nr05290d), 2015-01-01
Supplement: c5nr05290d1.xlsx [file c5nr05290d1.xlsx]

## Sheet: Foglio1
Table S1: LC MS/MS analysis of the polypeptides found in SDS-PAGE bands from the corona of SiO2-NPs (160 µg/ml) formed in 10% FCS
spot	protein	prot_score	prot_mass	prot_matches	prot_sequences	% sequence coverage	emPAI	% of total	% of significant hits
p220
	Alpha-2-macroglobulin	340	168953	193 (13)	60 (7)	53.08	0.44	83.0189	100
	Alpha-1-antiproteinase	41	46417	5 (1)	3 (1)	9.01	0.07	13.2075
	Complement C3	21	188675	32 (0)	23 (0)	17.06	0.02	3.77358
p120
	Complement factor H	294	144958	169 (11)	55 (8)	57.08	0.35	43.75	100
	Alpha-1-antiproteinase	67	46417	19 (1)	9 (1)	20.09	0.07	8.75
	Inter-alpha-trypsin inhibitor heavy chain H4	51	101620	44 (1)	20 (1)	26.05	0.09	11.25
	Serum albumin	46	71244	22 (1)	12 (1)	22.02	0.09	11.25
	Hemoglobin fetal subunit beta	17	15963	11 (0)	6 (0)	43.04	0.2	25
p75
	Plasminogen	46	93894	61 (1)	29 (1)	47.02	0.22	28.9474	100
	Serum albumin	30	71244	26 (1)	16 (1)	30.08	0.04	5.26316
	Hemoglobin fetal subunit beta	22	15963	14 (1)	5 (1)	43.04	0.2	26.3158
	Histidine-rich glycoprotein (Fragments)	18	45127	5 (0)	4 (0)	12.06	0.07	9.21053
	Alpha-1-antiproteinase	18	46417	8 (0)	5 (0)	14.02	0.07	9.21053
	Clusterin	17	51651	17 (0)	8 (0)	26.07	0.06	7.89474
	Apolipoprotein A-I	16	30258	11 (0)	6 (0)	25.03	0.1	13.1579
p50
	Serum albumin	75	71244	69 (5)	27 (3)	46.08	0.41	65.0794	100
	Alpha-2-HS-glycoprotein	26	39193	19 (0)	7 (0)	27	0.17	26.9841
	Hyaluronan-binding protein 2	17	64452	2 (0)	2 (0)	3.04	0.05	7.93651
p20
	Apolipoprotein A-I	511	30258	81 (24)	16 (9)	57	1.99	90.8676	100
	Hemoglobin fetal subunit beta	21	15963	11 (1)	7 (1)	54.5	0.2	9.13242
p12
	Hemoglobin fetal subunit beta	320	15963	68 (16)	13 (7)	89	6.58	86.0131	89.4022
	Hemoglobin subunit alpha	119	15175	46 (5)	9 (3)	68.3	0.78	10.1961	10.5978
	Apolipoprotein A-II	33	11252	6 (1)	2 (1)	26	0.29	3.79085
p8
	Apolipoprotein A-II	53	11252	13 (2)	5 (1)	55	0.29	82.8571	100
	Glial fibrillary acidic protein	31	49538	2 (1)	2 (1)	5.8	0.06	17.1429
