# Supplementary material for: The functional dissection of the plasma corona of SiO2-NPs spots histidine rich glycoprotein as a major player able to hamper nanoparticle capture by macrophages
Source: Royal Society of Chemistry journal article supplement (doi:10.1039/c5nr05290d), 2015-01-01
Supplement: c5nr05290d2.xlsx [file c5nr05290d2.xlsx]

## Sheet: NPs 20 µgml
Table S2A: LC MS/MS analysis of the polypeptides found in SDS-PAGE bands from the corona of SiO2-NPs (20 µg/ml) formed in 10% HP
spot	protein	prot_score	prot_mass	prot_matches	prot_sequences	% sequence coverage	emPAI	% of total	% of significant hits
p100
	Kininogen-1	2535	72996	177 (98)	27 (22)	37.6	2.15	69.8052	75.9717
	Histidine-rich glycoprotein	518	60510	29 (12)	12 (4)	24.4	0.37	12.013	13.0742
	Inter-alpha-trypsin inhibitor heavy chain H4	213	103521	27 (10)	14 (8)	15.7	0.23	7.46753	8.12721
	Apolipoprotein B-100	68	516651	6 (2)	6 (2)	1.4	0.01	0.324675	0.353357
	Gelsolin	49	86043	9 (2)	8 (2)	8.7	0.07	2.27273	2.4735
	Alpha-synuclein	45	14451	1 (1)	1 (1)	14.3	0.2	6.49351
	Protein Shroom3	38	218321	2 (2)	1 (1)	0.3	0.01	0.324675
	Xyloside xylosyltransferase 1	32	44235	11 (1)	1 (1)	1.3	0.03	0.974026
	Protein dopey-2	26	260348	2 (1)	2 (1)	0.7	0.01	0.324675
p60
	Histidine-rich glycoprotein	2304	60510	126 (75)	18 (13)	25.9	1.04	53.886	69.7987
	Kininogen-1	123	72996	13 (4)	8 (3)	11.6	0.16	8.29016	10.7383
	Lipopolysaccharide-binding protein	76	53521	3 (3)	2 (2)	4.6	0.11	5.69948	7.38255
	Vitronectin	44	55069	8 (2)	7 (2)	12.8	0.1	5.18135	6.71141
	Zinc finger protein 48	40	69203	13 (3)	2 (1)	2.4	0.04	2.07254
	Inter-alpha-trypsin inhibitor heavy chain H4	38	103521	7 (2)	6 (2)	6.1	0.08	4.14508	5.36913
	Zinc finger CCCH domain-containing protein 11A	36	89931	17 (1)	1 (1)	0.7	0.03	1.5544
	Protein Shroom3	34	218321	2 (1)	1 (1)	0.5	0.01	0.518135
	Cytosolic phospholipase A2 beta	34	89006	3 (1)	1 (1)	1	0.03	1.5544
	Cytochrome b-c1 complex subunit 7	32	13522	5 (1)	1 (1)	6.3	0.23	11.9171
	Ubiquitin-like modifier-activating enzyme ATG7	30	79050	7 (1)	1 (1)	0.9	0.04	2.07254
	Adenylate kinase 9	23	222698	12 (2)	4 (1)	2.3	0.01	0.518135
	Myosin light chain kinase 3	23	89079	8 (2)	1 (1)	0.6	0.03	1.5544
	Suppression of tumorigenicity 5	18	127603	12 (1)	1 (1)	0.5	0.02	1.03627

## Sheet: NPs 160 µgml
Table S2B: LC MS/MS analysis of the polypeptides found in SDS-PAGE bands from the corona of SiO2-NPs (160 µg/ml) formed in 10% HP
spot	protein	prot_score	prot_mass	prot_matches	prot_sequences	% sequence coverage	emPAI	% of total	% of significant hits
p300
	Apolipoprotein B-100	165	516651	191 (13)	112 (12)	23.7	0.11	6.07735	7.23684
	Fibrinogen alpha chain	140	95656	83 (9)	26 (6)	33	0.29	16.0221	19.0789
	Fibrinogen beta chain	124	56577	41 (10)	19 (8)	49.3	0.53	29.2818	34.8684
	Fibrinogen gamma chain	102	52106	67 (5)	24 (4)	51.7	0.59	32.5967	38.8158
	Apolipoprotein(a)	45	514737	18 (2)	6 (1)	1.6	0.01	0.552486
	Calpain-15 OS=Homo sapiens	33	119862	1 (1)	1 (1)	0.6	0.02	1.10497
	A-kinase anchor protein 12	33	191937	2 (1)	2 (1)	0.7	0.01	0.552486
	C4b-binding protein alpha chain	33	69042	21 (1)	13 (1)	20.3	0.12	6.62983
	Xyloside xylosyltransferase 1	32	44235	12 (2)	1 (1)	1.3	0.06	3.31492
	Nck-associated protein 5	30	210233	4 (1)	2 (1)	1.3	0.01	0.552486
	Alpha-2-macroglobulin	27	164613	16 (0)	15 (0)	9.6	0.02	1.10497
	SEC14 domain and spectrin repeat-containing protein 1	23	80040	6 (0)	2 (0)	2.3	0.04	2.20994
p220
	Apolipoprotein B-100	2972	516651	696 (153)	237 (86)	55.2	0.84	14.4082	16.8
	Fibrinogen alpha chain	963	95656	146 (39)	37 (16)	43	0.69	11.8353	13.8
	Fibrinogen beta chain	589	56577	89 (31)	27 (19)	58.2	1.86	31.9039	37.2
	Fibrinogen gamma chain	500	52106	83 (25)	27 (16)	62.3	1.61	27.6158	32.2
	Calpain-15	61	119862	3 (3)	1 (1)	0.6	0.02	0.343053
	DENN domain-containing protein 2C	57	108109	4 (2)	3 (1)	2.3	0.02	0.343053
	Charged multivesicular body protein 4a	55	25083	4 (2)	2 (1)	8.1	0.1	1.71527
	Proteoglycan 4	37	152238	13 (1)	8 (1)	5.1	0.03	0.51458
	BCL2/adenovirus E1B 19 kDa protein-interacting protein 2	34	36166	7 (2)	1 (1)	1.9	0.07	1.20069
	A-kinase anchor protein 12	33	191937	3 (3)	1 (1)	0.3	0.02	0.343053
	Synaptopodin-2	32	118069	11 (1)	3 (1)	1.6	0.02	0.343053
	Alpha-2-macroglobulin	32	164613	25 (1)	20 (1)	12.6	0.06	1.02916
	G patch domain-containing protein 8	31	165010	4 (1)	2 (1)	0.1	0.07	1.20069
	MAX gene-associated protein	31	333784	6 (0)	3 (0)	0.8	0.01	0.171527
	60S ribosomal protein L32	30	15964	2 (1)	1 (1)	5.3	0.16	2.74443
	Low-density lipoprotein receptor-related protein 5	28	182280	6 (0)	1 (0)	0.4	0.01	0.171527
	Protein BHLHb9	27	60994	4 (2)	1 (1)	1.1	0.04	0.686106
	Zinc finger protein 335	27	146798	3 (1)	1 (1)	0.5	0.2	3.43053
p150
	Plasma protease C1 inhibitor	248	55347	86 (11)	18 (6)	31.2	0.79	9.77723	15.6436
	Coagulation factor XII	161	70029	41 (7)	16 (3)	28	0.26	3.21782	5.14851
	Apolipoprotein B-100	147	516651	152 (13)	93 (12)	19.5	0.12	1.48515	2.37624
	Ig kappa chain C region	132	11773	21 (4)	5 (3)	80.2	2.65	32.797	52.4752
	Ig gamma-1 chain C region	114	36596	32 (4)	11 (4)	42.4	0.67	8.29208	13.2673
	Plasma kallikrein	98	73433	82 (7)	30 (6)	45.1	0.56	6.93069	11.0891
	Ig gamma-3 chain C region	44	42287	34 (1)	11 (1)	33.4	0.29	3.58911
	Ig gamma-2 chain C region	35	36505	25 (1)	8 (1)	25.8	0.34	4.20792
	Ig gamma-4 chain C region	35	36431	19 (1)	6 (1)	19.6	0.34	4.20792
	WD repeat-containing protein KIAA1875	34	182416	2 (1)	2 (1)	0.9	0.02	0.247525
	ATP-binding cassette sub-family E member 1	34	68240	3 (1)	2 (1)	2.2	0.04	0.49505
	Cytochrome c oxidase assembly protein COX15 homolog	34	46343	3 (1)	2 (1)	4.6	0.06	0.742574
	Leucine-rich repeat-containing protein 49	34	79358	4 (1)	2 (1)	1.9	0.04	0.49505
	DNA-directed RNA polymerase III subunit RPC1	34	157537	5 (1)	3 (1)	1.8	0.02	0.247525
	Cingulin	34	136532	3 (1)	1 (1)	0.4	0.02	0.247525
	Cingulin-like protein 1	34	149559	3 (1)	1 (1)	0.4	0.02	0.247525
	Selenoprotein P	31	44126	1 (1)	1 (1)	2.1	0.06	0.742574
	Ig lambda-2 chain C regions	31	11458	8 (0)	5 (0)	63.2	0.25	3.09406
	Ig lambda-3 chain C regions	31	11402	8 (0)	5 (0)	63.2	0.25	3.09406
	Complement C1q subcomponent subunit C	31	25985	5 (0)	3 (0)	16.3	0.11	1.36139
	UPF0606 protein KIAA1549L	27	199104	3 (2)	2 (1)	0.9	0.01	0.123762
	Kinesin-like protein KIF26A	27	197091	4 (2)	3 (1)	1.2	0.01	0.123762
	C2 calcium-dependent domain-containing protein 4C	26	44777	6 (1)	3 (1)	5.7	0.06	0.742574
	Histidine-rich glycoprotein	26	60510	9 (2)	6 (1)	10.1	0.09	1.11386
	Homeobox protein Nkx-6.2	26	29302	2 (0)	2 (0)	4	0.09	1.11386
	Titin	22	3842904	19 (0)	13 (0)	0.3	0	0
	Activating signal cointegrator 1 complex subunit 3	22	252898	7 (0)	2 (0)	0.8	0.01	0.123762
	Protein broad-minded	20	146658	2 (1)	2 (1)	1	0.02	0.247525
	Ig kappa chain V-I region Kue	20	12233	4 (1)	2 (1)	10.2	0.23	2.84653
	Putative uncharacterized protein PRO1854	20	8423	1 (1)	1 (1)	7.5	0.39	4.82673
	Uncharacterized protein C10orf88	20	49902	1 (1)	1 (1)	1.1	0.04	0.49505
	Complement C1q subcomponent subunit B	19	26933	6 (0)	4 (0)	11.5	0.22	2.72277
p120
	Apolipoprotein B-100	1131	516651	390 (62)	119 (37)	26.7	0.39	15.7895	31.9672
	Plasma kallikrein	134	73433	38 (7)	22 (6)	32	0.34	13.7652	27.8689
	Histidine-rich glycoprotein	61	60510	17 (1)	8 (1)	16	0.2	8.09717	16.3934
	Integrin alpha-IIb	60	114446	11 (3)	8 (3)	9	0.1	4.04858	8.19672
	Plasma serine protease inhibitor	58	45760	17 (2)	11 (2)	26.8	0.19	7.69231	15.5738
	Calpain-15	54	119862	5 (3)	2 (1)	0.6	0.02	0.809717
	Terminal uridylyltransferase	49	173288	16 (2)	2 (1)	0.8	0.02	0.809717
	Treslin	49	212721	16 (2	2 (1)	0.9	0.01	0.404858
	Inactive phospholipase C-like protein 1	49	124360	15 (2)	1 (1)	0.5	0.02	0.809717
	Charged multivesicular body protein 4a	44	25083	5 (1)	3 (1)	10.8	0.11	4.45344
	Histo-blood group ABO system transferase	35	41249	2 (1)	1 (1)	1.4	0.07	2.83401
	Myozenin-2	35	30132	2 (1)	1 (1)	1.9	0.09	3.64372
	Glutamate receptor ionotropic delta-1	33	113029	4 (1)	2 (1)	1.1	0.02	0.809717
	Xyloside xylosyltransferase 1	33	44235	15 (3)	1 (1)	1.3	0.06	2.42915
	Plasma protease C1 inhibitor	33	55347	9 (1)	8 (1)	19	0.05	2.02429
	Complement C1q subcomponent subunit C	32	25985	4 (0)	2 (0)	11	0.23	9.31174
	ATP-binding cassette sub-family E member 1	31	68240	5 (1)	2 (1)	1.8	0.04	1.61943
	Lysine-specific demethylase 4A	31	122581	4 (1)	1 (1)	0.5	0.02	0.809717
	Cytochrome c oxidase assembly protein COX15 homolog	31	46343	4 (1)	1 (1)	1.2	0.02	0.809717
	Cadherin-16	31	90380	4 (1)	1 (1)	0.6	0.17	6.88259
	Lymphoid-restricted membrane protein	30	62767	2 (1)	2 (1)	3.6	0.04	1.61943
	Fibrinogen gamma chain	30	52106	2 (1)	1 (1)	6	0.11	4.45344
	Alpha-2-antiplasmin	29	54873	4 (0)	4 (0)	7.9	0.05	2.02429
	Kininogen-1	29	72996	12 (1)	8 (1)	9.9	0.04	1.61943
	Vitronectin	27	55069	17 (0)	10 (0)	20.5	0.05	2.02429
	A-kinase anchor protein 12	26	191937	5 (1)	2 (1)	0.6	0.01	0.404858
p100'
	Kininogen-1	236	72996	122 (19)	25 (8)	31.7	0.74	62.1849	82.2222
	Histidine-rich glycoprotein	62	60510	22 (2)	10 (2)	17.5	0.14	11.7647	15.5556
	Apolipoprotein B-100	59	516651	28 (2)	21 (2)	4.2	0.02	1.68067	2.22222
	Complement C1q subcomponent subunit A	33	26285	5 (1)	2 (1)	6.9	0.11	9.2437
	Selenoprotein P	30	44126	9 (1)	4 (1)	8.1	0.13	10.9244
	Serum albumin	26	71317	28 (0)	14 (0)	20.2	0.04	3.36134
	Trinucleotide repeat-containing gene 6A protein	15	210967	1 (0)	1 (0)	0.5	0.01	0.840336
p100''
	Kininogen-1	235	72996	105 (16)	23 (7)	30.6	0.88	69.2913	100
	Complement C1q subcomponent subunit C	47	25985	9 (1)	4 (1)	21.2	0.11	8.66142
	Vitronectin	33	55069	2 (1)	2 (1)	2.1	0.05	3.93701
	Bromodomain adjacent to zinc finger domain protein 1A	33	180246	9 (1)	1 (1)	0.4	0.02	1.5748
	Histidine-rich glycoprotein	30	60510	15 (1)	10 (1)	18.1	0.05	3.93701
	Apolipoprotein B-100	29	516651	64 (1)	40 (1)	9.1	0.02	1.5748
	Serum albumin	23	71317	4 (0)	4 (0)	6.9	0.04	3.14961
	Complement C1q subcomponent subunit B	17	26933	5 (0)	4 (0)	11.5	0.1	7.87402
p75
	Apolipoprotein B-100	392	516651	185 (25)	90 (17)	19.1	0.14	2.99145	4.30769
	Plasminogen	248	93247	74 (11)	30 (8)	34.8	0.42	8.97436	12.9231
	Apolipoprotein E	202	36246	71 (10)	21 (8)	60.9	0.8	17.094	24.6154
	Kininogen-1	121	72996	54 (6)	16 (5)	25.3	0.56	11.9658	17.2308
	Vitronectin	106	55069	24 (5)	11 (3)	21.5	0.22	4.70085	6.76923
	Histidine-rich glycoprotein	78	60510	19 (2)	8 (2)	15.2	0.2	4.2735	6.15385
	Complement C1q subcomponent subunit C	67	25985	10 (2)	5 (2)	24.1	0.36	7.69231	11.0769
	Plasma kallikrein	66	73433	23 (3)	17 (3)	27	0.2	4.2735	6.15385
	BCL2/adenovirus E1B 19 kDa protein-interacting protein 2	61	36166	7 (4)	1 (1)	1.9	0.08	1.7094
	Selenoprotein P	60	44126	7 (2)	4 (2)	8.1	0.13	2.77778	4
	Complement C1q subcomponent subunit B	50	26933	7 (2)	4 (2)	14.6	0.22	4.70085	6.76923
	Gelsolin	35	86043	7 (1)	6 (1)	6.3	0.03	0.641026
	Ras-related protein Rab-35	35	23296	4 (2)	2 (1)	6	0.12	2.5641
	Insulin-like growth factor-binding protein complex acid labile subunit	34	66735	16 (1)	12 (1)	21	0.08	1.7094
	Protein BHLHb9	34	60994	3 (1)	2 (1)	2.6	0.05	1.06838
	Xyloside xylosyltransferase 1	33	44235	10 (2)	1 (1)	1.3	0.06	1.28205
	Calpain-15	32	119862	1 (1)	1 (1)	0.6	0.02	0.42735
	Alpha-1-acid glycoprotein 2	32	23873	3 (1)	2 (1)	12.4	0.12	2.5641
	Cartilage acidic protein 1	31	72174	6 (0)	6 (0)	6.8	0.04	0.854701
	A-kinase anchor protein 12	28	191937	2 (1)	2 (1)	1.2	0.01	0.213675
	Ubl carboxyl-terminal hydrolase 18	28	44009	1 (1)	1 (1)	1.6	0.07	1.49573
	Apolipoprotein A-I	27	30759	8 (0)	7 (0)	23.2	0.09	1.92308
	Coagulation factor XII	26	70029	4 (1)	3 (1)	4.1	0.04	0.854701
	Myosin light chain kinase 3	26	89079	6 (1)	4 (1)	4.6	0.03	0.641026
	PRA1 family protein 2	26	19588	4 (1)	2 (1)	5.6	0.14	2.99145
	UPF0606 protein KIAA1549L	26	199104	4 (1)	2 (1)	0.8	0.01	0.213675
	Kinesin-like protein KIF26A	26	197091	3 (1)	1 (1)	0.3	0.01	0.213675
	Haptoglobin-related protein	25	39518	22 (0)	9 (0)	23	0.07	1.49573
	Haptoglobin	25	45861	10 (0)	7 (0)	17.5	0.06	1.28205
	Clusterin	22	53031	3 (0)	3 (0)	7.6	0.05	1.06838
	Serum albumin	22	71317	9 (0)	7 (0)	9	0.08	1.7094
	Zinc finger SWIM domain-containing protein 4	20	111550	1 (0)	1 (0)	1.1	0.02	0.42735
	Complement component C8 gamma chain	20	22435	2 (0)	2 (0)	10.4	0.12	2.5641
	Integrin beta-3	17	90194	5 (1)	4 (1)	5.3	0.03	0.641026
p60
	Histidine-rich glycoprotein	582	60510	156 (29)	26 (11)	48.8	1.13	59.4737	82.4818
	Vitronectin	67	55069	30 (3)	13 (2)	25.7	0.16	8.42105	11.6788
	Serum albumin	44	71317	16 (2)	13 (2)	18.6	0.08	4.21053	5.83942
	Xyloside xylosyltransferase 1	34	44235	11 (4)	1 (1)	1.3	0.06	3.15789
	Inter-alpha-trypsin inhibitor heavy chain H4	32	103521	21 (0)	14 (0)	14.5	0.05	2.63158
	Plexin-B1	31	235401	6 (0)	2 (0)	0.5	0.01	0.526316
	Liprin-beta-1	31	114523	5 (0)	1 (0)	0.5	0.02	1.05263
	Ubinuclein-2	31	146625	5 (0)	1 (0)	0.4	0.02	1.05263
	GTPase-activating protein and VPS9 domain-containing protein 1	31	166359	5 (0)	1 (0)	0.3	0.02	1.05263
	Selenoprotein P	30	44126	13 (0)	7 (0)	13.4	0.2	10.5263
	Apolipoprotein A-I	27	30759	4 (0)	3 (0)	10.9	0.09	4.73684
	Apolipoprotein B-100	22	516651	46 (0)	30 (0)	5.9	0.01	0.526316
	Transmembrane protein 145	20	56011	1 (0)	1 (0)	3.4	0.05	2.63158
p50
	Serum albumin	698	71317	187 (40)	50 (22)	73.4	2.37	43.6464	60.4592
	Histidine-rich glycoprotein	114	60510	42 (5)	15 (4)	23.8	0.25	4.60405	6.37755
	Apolipoprotein A-I	47	30759	26 (2)	14 (2)	49.8	0.68	12.523	17.3469
	Selenoprotein P	43	44126	27 (3)	9 (3)	18.9	0.27	4.97238	6.88776
	Complement C1q subcomponent subunit A	39	26285	10 (2)	5 (2)	26.1	0.35	6.44567	8.92857
	Apolipoprotein B-100	38	516651	37 (1)	24 (1)	4.6	0.02	0.368324
	Vitronectin	37	55069	14 (1)	9 (1)	13.6	0.05	0.92081
	Beta-klotho	36	120473	10 (1)	1 (1)	0.02	0.5	9.2081
	Splicing regulatory glutamine/lysine-rich protein 1	36	59402	10 (1)	1 (1)	1	0.05	0.92081
	Serine/arginine-rich splicing factor 11	36	53624	10 (1)	1 (1)	1	0.05	0.92081
	Kinesin-like protein KIF20B	36	211868	10 (1)	1 (1)	0.3	0.05	0.92081
	Plexin-B1	36	235401	16 (1)	4 (1)	1.4	0.01	0.184162
	Ubinuclein-2	36	146625	13 (1)	3 (1)	1.9	0.02	0.368324
	Splicing factor 3B subunit 3	36	136575	10 (1)	2 (1)	1.2	0.02	0.368324
	Unconventional myosin-Ib	36	132928	9 (1)	2 (1)	1.1	0.02	0.368324
	GTPase-activating protein and VPS9 domain-containing protein 1	36	166359	10 (1)	2 (1)	1	0.02	0.368324
	Coagulation factor V	35	252686	22 (1)	16 (1)	7.4	0.02	0.368324
	Xyloside xylosyltransferase 1	34	44235	11 (4)	1 (1)	1.3	0.06	1.10497
	Disintegrin and metalloproteinase domain-containing protein 11	33	85873	4 (1)	2 (1)	1.6	0.03	0.552486
	BCL2/adenovirus E1B 19 kDa protein-interacting protein 2	32	36166	5 (0)	1 (0)	1.9	0.08	1.4733
	Platelet glycoprotein Ib alpha chain	31	69425	4 (1)	3 (1)	4.2	0.04	0.736648
	Protein phosphatase 1J	31	55484	4 (2)	2 (1)	4	0.05	0.92081
	Protein phosphatase 1M	31	30698	3 (2)	1 (1)	1.9	0.09	1.65746
	Kininogen-1	27	72996	20 (0)	12 (0)	16.1	0.04	0.736648
	Apolipoprotein E	25	36246	17 (0)	11 (0)	30.6	0.08	1.4733
	Lysine-specific demethylase 4A	22	122581	6 (1)	2 (1)	1.3	0.02	0.368324
	WD repeat-containing protein KIAA1875	22	182416	6 (1)	2 (1)	0.7	0.02	0.368324
	ATP-binding cassette sub-family E member 1	22	68240	5 (1)	1 (1)	0.8	0.04	0.736648
	Platelet glycoprotein Ib beta chain	20	22274	10 (0)	7 (0)	24.3	0.13	2.39411
p20
	Apolipoprotein A-I	757	30759	263 (44)	30 (16)	77.9	5.7	95.6376	100
	Ryanodine receptor 3	29	557790	17 (2)	2 (1)	0.2	0.01	0.167785
	Serine/threonine-protein phosphatase 2B catalytic subunit beta isoform	23	59671	5 (0)	1 (0)	1	0.05	0.838926
	Serine/threonine-protein phosphatase 2B catalytic subunit gamma isoform	23	58777	5 (0)	1 (0)	1	0.05	0.838926
	Fibroblast growth factor receptor 4	23	88811	12 (0)	1 (0)	0.6	0.03	0.503356
	Proprotein convertase subtilisin/kexin type 6	23	109544	12 (0)	1 (0)	0.5	0.03	0.503356
	Coiled-coil domain-containing protein 86	23	40325	12 (0)	1 (0)	1.4	0.03	0.503356
	DDB1- and CUL4-associated factor 4-like protein 1	23	44977	12 (0)	1 (0)	1.3	0.06	1.00671
p12
	Apolipoprotein A-II	203	11282	76 (10)	7 (5)	51	2.82	72.4936	87.3065
	Apolipoprotein A-I	55	30759	28 (2)	14 (2)	50.6	0.41	10.5398	12.6935
	Serum amyloid A-4 protein	41	14851	30 (2)	6 (1)	41.5	0.19	4.88432
	NXPE family member 2	34	65601	23 (1)	1 (1)	0.9	0.04	1.02828
	Xyloside xylosyltransferase 1	34	44235	17 (5)	1 (1)	1.3	0.06	1.54242
	Apolipoprotein C-IV	30	14886	18 (1)	8 (1)	41.7	0.19	4.88432
	Apolipoprotein E	29	36246	12 (1)	7 (1)	23.7	0.16	4.11311
	Tau-tubulin kinase 1	23	142992	4 (0)	3 (0)	2.3	0.02	0.514139
p10
	Apolipoprotein C-III	146	10846	13 (4)	3 (1)	34.3	0.26	11.6592
	Apolipoprotein E	114	36246	45 (5)	14 (3)	36.3	0.34	15.2466	33.3333
	Serum amyloid A-4 protein	60	14851	62 (6)	7 (3)	36.2	0.68	30.4933	66.6667
	Apolipoprotein A-I	41	30759	26 (1)	13 (1)	46.4	0.3	13.4529
	Apolipoprotein A-II	35	11282	16 (1)	4 (1)	27	0.25	11.2108
	Xyloside xylosyltransferase 1	32	44235	14 (3)	1 (1)	1.3	0.06	2.69058
	RNA-binding motif protein X-linked-like-2	32	42959	3 (1)	1 (1)	2	0.07	3.13901
	Apolipoprotein C-II	31	11277	3 (0)	2 (0)	29.7	0.25	11.2108
	NACHT LRR and PYD domains-containing protein 7	25	113902	2 (1)	2 (1)	2.2	0.02	0.896861
