# Supplementary material for: The functional dissection of the plasma corona of SiO2-NPs spots histidine rich glycoprotein as a major player able to hamper nanoparticle capture by macrophages
Source: Royal Society of Chemistry journal article supplement (doi:10.1039/c5nr05290d), 2015-01-01
Supplement: c5nr05290d3.xlsx [file c5nr05290d3.xlsx]

## Sheet: 100% HP BL
Table S3A: LC MS/MS analysis of the polypeptides found in SDS-PAGE bands from mock sample (no NPs) in 100% HP
spot	protein	prot_score	prot_mass	prot_matches	prot_sequences	% sequence coverage	emPAI	% of total	% of significant hits
p220
	Apolipoprotein B-100	214	516651	149 (12)	103 (12)	24.9	0.09	12.3288	13.6364
	Fibronectin	184	266052	47 (4)	30 (3)	17.9	0.07	9.58904	10.6061
	Alpha-2-macroglobulin	94	164613	61 (7)	35 (6)	30.9	0.14	19.1781	21.2121
	Fibrinogen alpha chain	74	95656	34 (5)	14 (4)	18.6	0.13	17.8082	19.697
	Fibrinogen beta chain	70	56577	34 (4)	18 (4)	42.6	0.23	31.5068	34.8485
	Pregnancy zone protein	35	165242	9 (1)	6 (1)	4.2	ND	ND	ND
	Uncharacterized protein C15orf52	28	57803	2 (0)	1 (0)	1.1	ND	ND	ND
	Fibrinogen gamma chain	27	52106	25 (1)	13 (1)	32.7	0.07	9.58904	10.6061
p150
	Ig kappa chain C region	70	11773	14 (2)	3 (1)	49.1	0.21	5.38462
	Ig kappa chain V-III region SIE	40	11882	8 (1)	3 (1)	37.6	0.21	5.38462
	Ig kappa chain V-III region Ti	40	11895	8 (1)	3 (1)	37.6	0.21	5.38462
	Ig kappa chain V-III region WOL	40	11853	8 (1)	3 (1)	37.6	0.21	5.38462
	Ig kappa chain V-III region GOL	40	11937	8 (1)	3 (1)	37.6	0.21	5.38462
	Ig kappa chain V-III region NG9 (Fragment)	40	10836	6 (1)	2 (1)	16	ND	ND
	Ig kappa chain V-III region B6	40	11742	7 (1)	3 (1)	23.1	ND	ND
	Ig gamma-2 chain C region	32	36505	28 (1)	7 (1)	21.5	0.07	1.79487
	Ig kappa chain V-I region AG	29	12099	1 (1)	1 (1)	16.7	0.2	5.12821
	Ig kappa chain V-I region AU	29	12046	1 (1)	1 (1)	16.7	0.2	5.12821
	Ig kappa chain V-I region Gal	29	11921	1 (1)	1 (1)	16.7	0.2	5.12821
	Ig kappa chain V-I region Hau	29	11778	1 (1)	1 (1)	16.7	0.2	5.12821
	Ig kappa chain V-I region Rei	29	12009	1 (1)	1 (1)	16.7	0.2	5.12821
	Ig kappa chain V-I region Roy	29	11889	1 (1)	1 (1)	16.7	0.2	5.12821
	Ig kappa chain V-I region Scw	29	11871	1 (1)	1 (1)	16.7	0.2	5.12821
	Ig kappa chain V-I region WEA	29	11947	1 (1)	1 (1)	16.7	0.1	2.5641
	Ig kappa chain V-I region WAT	29	11844	1 (1)	1 (1)	16.7	0.1	2.5641
	Ig kappa chain V-I region DEE	29	11768	1 (1)	1 (1)	16.7	0.2	5.12821
	Ig kappa chain V-I region OU	29	11884	1 (1)	1 (1)	16.7	0.2	5.12821
	Ig lambda-2 chain C regions	28	11458	6 (0)	3 (0)	37.7	0.2	5.12821
	Ig lambda-3 chain C regions	28	11402	6 (0)	3 (0)	37.7	0.2	5.12821
	Ig heavy chain V-III region BRO	25	13332	6 (0)	2 (0)	20	0.18	4.61538
	Ig heavy chain V-III region TEI	25	12908	6 (0)	2 (0)	20.2	0.18	4.61538
	Protocadherin gamma-B7	18	101482	1 (0)	1 (0)	1.1	0.02	0.512821
p120
	Integrin alpha-6	39	127751	32 (2)	24 (2)	21.9	0.04	6.66667	100
	Xyloside xylosyltransferase 1	33	44235	23 (4)	1 (1)	1.3	ND	ND
	Ensconsin	29	84116	1 (1)	1 (1)	1.3	0.03	5
	Actin, cytoplasmic 1	29	42052	6 (1)	4 (1)	8.8	0.06	10
	Actin, alpha cardiac muscle 1	29	42334	6 (1)	4 (1)	8.8	0.06	10
	Actin, cytoplasmic 2	29	42108	6 (1)	4 (1)	8.8	0.06	10
	Actin, gamma-enteric smooth muscle	29	42249	6 (1)	4 (1)	8.8	0.06	10
	Actin, alpha skeletal muscle	29	42366	6 (1)	4 (1)	8.8	0.06	10
	Ig kappa chain C region	17	11773	5 (0)	3 (0)	51.9	0.21	35
	Arylacetamide deacetylase-like 2	15	46469	1 (0)	1 (0)	4	0.05	8.33333
p100
	Xyloside xylosyltransferase 1	31	44235	18 (3)	1 (1)	1.3	0.06	66.6667
	Serum albumin	23	71317	11 (0)	8 (0)	10.3	0.03	33.3333
p60
	Serum albumin	41	71317	63 (2)	31 (1)	53.7	0.26	65
	Xyloside xylosyltransferase 1	34	44235	20 (3)	1 (1)	1.3	0.06	15
	Somatostatin receptor type 5	21	39804	1 (0)	1 (0)	3	0.07	17.5
p50
	Serum albumin	95	71317	102 (10)	38 (8)	67.2	0.4	86.9565	100
	Xyloside xylosyltransferase 1	32	44235	10 (2)	1 (1)	1.3	0.06	13.0435
	Bile acid receptor	25	56847	1 (1)	1 (1)	2.9	ND	ND
p20
	Apolipoprotein A-I	72	30759	91 (5)	25 (4)	75.3	0.58	95.082	100
	Zinc finger CCCH domain-containing protein 11A	32	89931	10 (1)	1 (1)	0.7	0.03	4.91803

## Sheet: 100%HP NPs 20
Table S3B: LC MS/MS analysis of the polypeptides found in SDS-PAGE bands from the corona of SiO2-NPs (20 µg/ml) formed in 100% HP
spot	protein	prot_score	prot_mass	prot_matches	prot_sequences	% sequence coverage	emPAI	% of total	% of significant hits
p220
	Apolipoprotein B-100	126	516651	264 (12)	153 (12)	33	0.11	11	20.7547
	Alpha-2-macroglobulin	115	164613	94 (7)	44 (7)	32.6	0.18	18	33.9623
	Fibrinogen alpha chain	56	95656	56 (4)	24 (3)	28.9	0.09	9	16.9811
	Fibrinogen beta chain	46	56577	24 (2)	14 (2)	27.7	0.15	15	28.3019
	Serine palmitoyltransferase 2	38	63568	8 (1)	2 (1)	2.3	0.04	4
	Thyroglobulin	36	311608	7 (1)	2 (1)	0.4	0.01	1
	BCL2/adenovirus E1B 19 kDa protein-interacting protein 2	36	36166	5 (1)	1 (1)	1.9	0.08	8
	N-glycosylase/DNA lyase	35	39214	2 (1)	2 (1)	4.6	0.07	7
	Protein phosphatase 1 regulatory subunit 3B	35	33073	7 (1)	1 (1)	2.5	0.08	8
	Inactive phospholipase C-like protein 1	30	124360	4 (1)	1 (1)	0.5	0.02	2
	Inactive phospholipase C-like protein 2	30	127268	4 (1)	1 (1)	0.4	0.02	2
	A-kinase anchor protein 12	29	191937	3 (1)	2 (1)	0.7	0.01	1
	Fibronectin	28	266052	10 (0)	7 (0)	2.4	0.03	3
	Clathrin heavy chain 1	24	193260	2 (1)	1 (1)	0.4	0.01	1
	Fibrinogen gamma chain	22	52106	25 (0)	14 (0)	24.5	0.05	5
p150
	Ig kappa chain C region	1337	11773	33 (32)	5 (5)	80.2	4.62	23.0885	27.451
	Ig gamma-1 chain C region	666	36596	51 (24)	8 (7)	25.5	0.93	4.64768	5.52585
	Ig gamma-2 chain C region	626	36505	52 (24)	8 (6)	25.8	0.93	4.64768	5.52585
	Ig gamma-3 chain C region	518	42287	55 (24)	9 (8)	23.6	0.88	4.3978	5.22876
	Ig gamma-4 chain C region	359	36431	33 (12)	7 (4)	21.4	0.55	2.74863	3.26797
	Ig lambda-2 chain C regions	262	11458	20 (11)	5 (4)	63.2	2.03	10.1449	12.0618
	Ig lambda-3 chain C regions	262	11402	20 (11)	5 (4)	63.2	2.03	10.1449	12.0618
	Immunoglobulin lambda-like polypeptide 5	170	23391	18 (10)	4 (4)	21.5	0.57	2.84858	3.38681
	Haptoglobin	166	45861	12 (5)	8 (4)	18	0.42	2.09895	2.49554
	Ig alpha-1 chain C region	146	38486	17 (6)	9 (4)	25.8	0.32	1.5992	1.90137
	Coagulation factor XI	123	72116	16 (5)	13 (4)	19.4	0.3	1.49925	1.78253
	Ig kappa chain V-III region SIE	120	11882	9 (3)	4 (3)	45.9	0.9	4.49775	5.34759
	Ig kappa chain V-III region WOL	120	11853	9 (3)	4 (3)	45.9	0.9	4.49775	5.34759
	Ig heavy chain V-III region BRO	118	13332	8 (3)	3 (2)	29.2	0.47	2.34883	2.79263
	Fibrinogen beta chain	74	56577	12 (4)	9 (4)	16.7	0.27	1.34933	1.60428
	Ig kappa chain V-I region Hau	68	11778	9 (1)	2 (1)	22.2	0.24	1.1994
	Ig kappa chain V-I region WEA	68	11947	9 (1)	2 (1)	22.2	0.24	1.1994
	Ig kappa chain V-I region DEE	68	11768	9 (1)	2 (1)	22.2	0.24	1.1994
	Ig kappa chain V-I region OU	68	11884	9 (1)	2 (1)	22.2	0.24	1.1994
	Ig kappa chain V-I region Roy	68	11889	2 (1)	2 (1)	24.1	0.24	1.1994
	Kininogen-1	67	72996	8 (3)	7 (3)	10.2	0.12	0.5997	0.713012
	Apolipoprotein B-100	49	516651	24 (1)	24 (1)	4.4	0.02	0.09995
	Complement C4-B	46	194170	1 (1)	1 (1)	1.5	0.01	0.049975
	Ig kappa chain V-III region VG (Fragment)	32	12681	8 (0)	2 (0)	13.9	0.08	0.3998
	Ig kappa chain V-III region NG9 (Fragment)	30	10836	6 (2)	2 (2)	16	0.59	2.94853	3.50564
	Histidine-rich glycoprotein	29	60510	8 (0)	5 (0)	8.2	0.05	0.249875
	Ig kappa chain V-III region POM	28	12029	7 (1)	2 (1)	14.7	0.24	1.1994
	Ig kappa chain V-III region CLL	28	14380	7 (1)	2 (1)	12.4	0.24	1.1994
	Fibronectin	28	266052	14 (1)	13 (1)	5.9	0.03	0.149925
	Electron transfer flavoprotein subunit beta	28	28054	1 (0)	1 (0)	2	0.1	0.49975
	Tetratricopeptide repeat protein 39A	28	70702	1 (0)	1 (0)	0.8	0.1	0.49975
	Transforming growth factor beta regulator 1	28	45487	1 (0)	1 (0)	0.2	0.04	0.1999
	Plasma protease C1 inhibitor	28	55347	1 (0)	1 (0)	2	0.05	0.249875
	Ig kappa chain V-I region Kue	26	12233	10 (1)	2 (1)	10.2	0.23	1.14943
	Uncharacterized protein C10orf88	26	49902	3 (1)	2 (1)	3.8	0.06	0.29985
	Protein broad-minded	26	146658	3 (1)	2 (1)	0.8	0.02	0.09995
	Putative uncharacterized protein PRO1854	26	8423	2 (1)	1 (1)	7.5	0.39	1.94903
	Interleukin-12 receptor subunit beta-2	26	98499	2 (1)	1 (1)	0.6	0.03	0.149925
	Filamin-A	25	283301	4 (0)	4 (0)	1.4	0.01	0.049975
	Fibrinogen alpha chain	25	95656	6 (0)	5 (0)	3.9	0.06	0.29985
	Ig heavy chain V-III region GAL	24	12836	5 (0)	2 (0)	12.1	0.22	1.09945
p120
	Coagulation factor XI	3640	72116	195 (124)	29 (25)	48.3	2.2	19.4004	25.3749
	Apolipoprotein B-100	1141	516651	149 (61)	86 (46)	17.9	0.3	2.6455	3.46021
	Complement C4-A	664	194261	57 (29)	29 (18)	17.8	0.34	2.99824	3.92157
	Ig kappa chain C region	592	11773	16 (13)	4 (3)	67	2.65	23.3686	30.5652
	Ig gamma-2 chain C region	387	36505	21 (13)	7 (6)	24.2	0.55	4.85009	6.34371
	Ig alpha-1 chain C region	363	38486	20 (10)	9 (7)	25.8	0.63	5.55556	7.26644
	Aminopeptidase N	330	109870	37 (17)	22 (12)	23.3	0.45	3.96825	5.19031
	Histidine-rich glycoprotein	276	60510	22 (8)	9 (5)	16.8	0.43	3.79189	4.95963
	Ig gamma-3 chain C region	255	42287	17 (10)	6 (5)	16.4	0.37	3.26279	4.26759
	Kininogen-1	128	72996	18 (5)	9 (5)	12.7	0.2	1.76367	2.30681
	Serum albumin	110	71317	21 (6)	14 (6)	20	0.26	2.29277	2.99885
	Ig lambda-2 chain C regions	109	11458	9 (1)	4 (1)	53.8	0.25	2.20459
	Ig lambda-3 chain C regions	109	11402	9 (1)	4 (1)	0.12	0.25	2.20459
	Immunoglobulin lambda-like polypeptide 5	109	23391	9 (1)	4 (1)	21.5	0.12	1.0582
	Plasma kallikrein	85	73433	8 (4)	6 (3)	8.2	0.16	1.41093	1.84544
	Complement C3	74	188569	24 (4)	20 (4)	10.2	0.07	0.617284	0.807382
	Integrin alpha-2	72	130468	7 (2)	7 (2)	6	0.06	0.529101	0.692042
	Fibrinogen beta chain	53	56577	4 (1)	4 (1)	7.5	0.1	0.881834
	Dermcidin	52	11391	2 (1)	2 (1)	16.4	0.25	2.20459
	Transmembrane protease serine 6	40	92109	17 (5)	2 (1)	2.6	0.06	0.529101
	Leucine-rich repeat protein 1	39	47548	2 (1)	1 (1)	1.4	0.06	0.529101
	Ig heavy chain V-III region WEA	38	12363	4 (1)	2 (1)	14	0.23	2.02822
	Ig heavy chain V-III region BRO	38	13332	4 (1)	2 (1)	13.3	0.23	2.02822
	Ig heavy chain V-III region BUT	38	12485	4 (1)	2 (1)	13.3	0.23	2.02822
	Ig heavy chain V-III region CAM	38	13773	4(1)	2 (1)	13.1	0.23	2.02822
	Armadillo repeat protein deleted in velo-cardio-facial syndrome	33	105262	2 (1)	1 (1)	0.7	0.03	0.26455
	CUB domain-containing protein 1	31	94298	6 (1)	1 (1)	1.1	0.01	0.0881834
	Plasma protease C1 inhibitor	29	55347	1 (0)	1 (0)	2	0.05	0.440917
	Anoctamin-4	28	112530	5 (0)	1 (0)	0.5	0.03	0.26455
	Calpain-15	28	119862	3 (1)	2 (1)	0.6	0.02	0.176367
	Integrin alpha-IIb	27	114446	1 (1)	1 (1)	0.9	0.02	0.176367
	Filamin-A	26	283301	4 (0)	3 (0)	1.02	0.01	0.0881834
	CUB and sushi domain-containing protein 3	25	414007	4 (1)	1 (1)	0.3	0.01	0.0881834
	Fibrinogen alpha chain	21	95656	3 (0)	3 (0)	2.3	0.03	0.26455
	Zinc finger protein 438	21	93089	4 (1)	2 (1)	2.2	0.03	0.26455
	Lysine-specific demethylase 4A	21	122581	3 (1)	1 (1)	0.5	0.02	0.176367
	Cadherin-16	21	90380	3 (1)	1 (1)	0.6	0.17	1.49912
	WD repeat-containing protein KIAA1875	21	182416	3 (1)	1 (1)	0.3	0.17	1.49912
	NF-kappa-B inhibitor-like protein 1	17	43577	1 (0)	1 (0)	2.6	0.06	0.529101
p100
	Kininogen-1	92	72996	28 (6)	7 (3)	9.9	0.12	50	50
	Coagulation factor XI	64	72116	6 (3)	4 (3)	8	0.12	50	50
p60
	Histidine-rich glycoprotein	3317	60510	175 (106)	24 (18)	39.4	1.67	31.6888	41.5423
	Serum albumin	680	71317	57 (24)	24 (14)	36.5	0.77	14.611	19.1542
	Serotransferrin	259	79294	27 (11)	20 (10)	29.9	0.41	7.77989	10.199
	Lipopolysaccharide-binding protein	238	53521	8 (7)	6 (5)	16	0.29	5.50285	7.21393
	Inter-alpha-trypsin inhibitor heavy chain H4	207	103521	34 (9)	12 (6)	12.4	0.23	4.36433	5.72139
	Vitronectin	119	55069	12 (6)	8 (4)	14.9	0.22	4.17457	5.47264
	Kininogen-1	92	72996	17 (5)	9 (5)	13.4	0.25	4.74383	6.21891
	Galectin-3-binding protein	87	66202	18 (4)	9 (4)	13.7	0.18	3.41556	4.47761
	Zinc finger protein 48	48	69203	10 (4)	1 (1)	1.6	0.04	0.759013
	Mediator of RNA polymerase II transcription subunit 30	47	20435	2 (1)	1 (1)	5.1	0.13	2.46679
	Plasma kallikrein	45	73433	3 (2)	2 (1)	2.5	0.04	0.759013
	Alpha-1-antitrypsin	39	46878	3 (1)	3 (1)	5.7	0.06	1.13852
	Mitogen-activated protein kinase 1	37	41762	2 (1)	1 (1)	1.9	0.07	1.32827
	Zinc finger BED domain-containing protein 5	36	80001	12 (1)	1 (1)	1.2	0.04	0.759013
	Cytochrome b-c1 complex subunit 7	34	13522	5 (1)	1 (1)	6.3	0.21	3.98482
	Serine/threonine-protein kinase Chk2	32	61618	1 (1)	1 (1)	1.3	0.04	0.759013
	Integrin alpha-D	32	127932	4 (1)	1 (1)	0.4	0.02	0.379507
	Janus kinase and microtubule-interacting protein 3	32	98640	4 (1)	1 (1)	0.6	0.02	0.379507
	Syntaxin-binding protein 5	32	129088	2 (1)	1 (1)	0.4	0.02	0.379507
	CD164 sialomucin-like 2 protein	32	19263	2 (1)	1 (1)	2.9	0.14	2.65655
	39S ribosomal protein L30, mitochondrial	32	18648	4 (1)	1 (1)	3.1	0.16	3.03605
	Xyloside xylosyltransferase 1	31	44235	10 (2)	1 (1)	1.3	0.03	0.56926
	Plasminogen	31	93247	8 (1)	6 (1)	6.7	0.03	0.56926
	Coagulation factor XI	27	72116	5 (1)	5 (1)	7.4	0.08	1.51803
	Alpha-1-antichymotrypsin	26	47792	1 (0)	1 (0)	2.4	0.06	1.13852
	UPF0606 protein KIAA1549L	25	199104	14 (4)	4 (1)	1.4	0.01	0.189753
	Adenylate kinase 9	25	222698	14 (4)	3 (1)	1.6	0.01	0.189753
	Myosin light chain kinase 3	25	89079	10 (4)	1 (1)	0.6	0.03	0.56926
	Kinesin-like protein KIF26A	25	197091	10 (4)	1 (1)	0.3	0.01	0.189753
p50
	Serum albumin	230	71317	126 (22)	43 (13)	64.9	0.77	70	79.3814
	Histidine-rich glycoprotein	129	60510	52 (5)	16 (3)	25.3	0.2	18.1818	20.6186
	Anoctamin-4	29	112530	3 (1)	1 (1)	0.5	0.03	2.72727
	Complement C1q subcomponent subunit B	27	26933	9 (0)	5 (0)	24.1	0.1	9.09091
p20
	Apolipoprotein A-I	79	30759	89 (7)	24 (5)	73.4	0.68	91.8919	100
	Xyloside xylosyltransferase 1	32	44235	11 (1)	1 (1)	1.3	0.06	8.10811
