# Supplementary material for: The functional dissection of the plasma corona of SiO2-NPs spots histidine rich glycoprotein as a major player able to hamper nanoparticle capture by macrophages
Source: Royal Society of Chemistry journal article supplement (doi:10.1039/c5nr05290d), 2015-01-01
Supplement: c5nr05290d4.xlsx [file c5nr05290d4.xlsx]

## Sheet: Foglio1
Table S4: LC MS/MS analysis of the polypeptides found in SDS-PAGE bands from the corona of SiO2-NPs (160 µg/ml) formed in 10% MP
spot	protein	prot_score	prot_mass	prot_matches	prot_sequences	% sequence coverage	emPAI	% of total	% of significant hits
p220'
	Fibrinogen beta chain	2018	55402	196 (96)	49 (34)	55.9	4.54	50.0551	55.0971
	Alpha-2-macroglobulin	1304	167116	205 (73)	73 (42)	30.7	1	11.0254	12.1359
	Fibrinogen gamma chain	1099	50044	156 (55)	23 (10)	50.7	2.25	24.8071	27.3058
	Ig mu chain C region	181	50625	30 (8)	13 (5)	28.2	0.38	4.18964	4.61165
	Fibronectin	85	276017	37 (3)	20 (3)	9.7	0.07	0.771775	0.849515
	Histidine-rich glycoprotein	44	60095	7 (2)	4 (1)	6.5	0.05	0.551268
	Adenosylhomocysteinase	36	48170	2 (1)	1 (1)	1.9	0.06	0.661521
	Probable E3 ubiquitin-protein ligase MID2	36	81433	4 (1)	1 (1)	0.7	0.03	0.330761
	Chromodomain-helicase-DNA-binding protein 6	36	308000	6 (1)	3 (1)	0.7	0.01	0.110254
	Chromodomain-helicase-DNA-binding protein 9	36	325826	5 (1)	2 (1)	0.6	0.09	0.992282
	Rho guanine nucleotide exchange factor 18	36	114893	5 (1)	2 (1)	1.6	0.02	0.220507
	Helix-loop-helix protein 1	36	14935	4 (1)	1 (1)	3.8	0.19	2.09482
	Helix-loop-helix protein 2	36	15052	4 (1)	1 (1)	3.7	0.19	2.09482
	NUT family member Gm806	36	81222	4 (1)	1 (1)	0.7	0.03	0.330761
	Myomegalin	34	251902	3 (1)	1 (1)	0.3	0.01	0.110254
	A-kinase anchor protein 9	34	439138	3 (1)	1 (1)	0.2	0.01	0.110254
	Cytoplasmic dynein 2 heavy chain 1	33	495451	4 (1)	1 (1)	0.2	0.01	0.110254
	Exocyst complex component 3	31	87084	6 (1)	1 (1)	1.3	0.03	0.330761
	E3 ubiquitin-protein ligase DTX3L	27	84018	2 (1)	1 (1)	1.1	0.03	0.330761
	Murinoglobulin-1	22	166618	12 (1)	7 (1)	4.6	0.03	0.330761
	Murinoglobulin-2	22	163705	12 (1)	7 (1)	4.7	0.03	0.330761
	Vacuolar protein sorting-associated protein 13C	19	422162	6 (1)	2 (1)	0.4	0.01	0.110254
	Complement C3	19	187905	8 (0)	5 (0)	2.7	0.01	0.110254
	ATP-binding cassette sub-family G member 2	19	73501	2 (1)	1 (1)	0.8	N D	N D
	Transcription initiation factor TFIID subunit 7-like	19	53271	2 (1)	1 (1)	1.1	ND	ND
	Serine/threonine-protein kinase D2	17	97792	3 (1)	2 (1)	2.2	ND	ND
	Pre T-cell antigen receptor alpha	17	21762	2 (1)	1 (1)	2.5	ND	ND
p220''
	Fibronectin	532	276017	115 (33)	45 (17)	23.3	0.32	5.67376	6.34921
	Plasma protease C1 inhibitor	402	55834	28 (12)	12 (5)	27.6	0.47	8.33333	9.3254
	Complement C3	398	187905	79 (18)	39 (12)	24.1	0.32	5.67376	6.34921
	Fibrinogen beta chain	374	55402	47 (21)	19 (12)	45.3	1.07	18.9716	21.2302
	Plasma kallikrein	245	73446	41 (10)	19 (6)	32.4	0.39	6.91489	7.7381
	Alpha-2-macroglobulin	205	167116	41 (13)	22 (9)	17.7	0.26	4.60993	5.15873
	Apolipoprotein B-100	177	510481	49 (13)	30 (9)	6.8	0.06	1.06383	1.19048
	Fibrinogen gamma chain	170	50044	40 (8)	13 (3)	33.5	0.31	5.49645	6.15079
	Histidine-rich glycoprotein	162	60095	43 (8)	12 (7)	22.7	0.5	8.86525	9.92063
	Coagulation factor XI	120	71739	32 (5)	13 (3)	18.6	0.16	2.83688	3.1746
	Ig gamma-2A chain C region A allele	107	36936	17 (3)	4 (3)	16.1	0.54	9.57447	10.7143
	Ig gamma-2A chain C region membrane-bound form	107	44605	17 (3)	4 (3)	13.3	0.54	9.57447	10.7143
	Murinoglobulin-1	78	166618	26 (4)	12 (3)	7.9	0.1	1.77305	1.98413
	ATP-binding cassette sub-family B member 9	42	84309	3 (1)	1 (1)	0.9	0.02	0.35461
	Spectrin alpha chain erythrocytic 1	38	280833	8 (1)	8 (1)	3.9	0.02	0.35461
	E3 ubiquitin-protein ligase TRIM33	36	125931	3 (1)	1 (1)	0.8	0.02	0.35461
	Ubiquitin carboxyl-terminal hydrolase 19	35	152222	3 (1)	2 (1)	2.3	0.02	0.35461
	Ig gamma-1 chain C region membrane-bound form	35	44043	8 (2)	3 (1)	16	0.13	2.30496
	Ig gamma-1 chain C region secreted form	35	36252	8 (2)	3 (1)	19.4	0.13	2.30496
	Complement C5	27	190469	6 (2)	4 (1)	2.5	0.1	1.77305
	Rap1 GTPase-activating protein 1	27	73901	1 (0)	1 (0)	1.2	0.01	0.177305
	Transferrin receptor protein 1	22	86076	4 (0)	2 (0)	2.9	0.03	0.531915
	Ig heavy chain Mem5 (Fragment)	21	25790	7 (0)	2 (0)	6.8	0.11	1.95035
	Zinc finger BED domain-containing protein 4	18	132086	3 (1)	2 (1)	1.5	0.02	0.35461
	Vacuolar protein sorting-associated protein 13C	18	422162	6 (1)	5 (1)	1.3	0.01	0.177305
p100
	Kininogen-1	304	74140	57 (12)	14 (6)	25.1	0.39	15.9836	16.5254
	Histidine-rich glycoprotein	261	60095	62 (16)	12 (7)	21.5	0.71	29.0984	30.0847
	Band 3 anion transport protein	185	103412	45 (12)	17 (8)	18.1	0.3	12.2951	12.7119
	Hemoglobin subunit beta-1	82	15944	12 (3)	6 (2)	46.9	0.91	37.2951	38.5593
	Inter alpha-trypsin inhibitor heavy chain 4	43	104765	15 (2)	7 (2)	6.8	0.05	2.04918	2.11864
	Serine/threonine-protein kinase mTOR	23	290657	7 (1)	2 (1)	0.5	0.01	0.409836
	Protein MB21D2	23	49016	5 (1)	2 (1)	3.5	0.05	2.04918
	Integrator complex subunit 3	23	119401	4 (1)	1 (1)	0.5	0.02	0.819672
p60
	Histidine-rich glycoprotein	628	60095	90 (35)	20 (12)	38.5	1.05	88.2353	100
	Clusterin	30	52250	4 (1)	4 (1)	9.8	0.05	4.20168
	Serine protease inhibitor A3K	26	47021	1 (0)	1 (0)	5.5	0.06	5.04202
	Cytosolic phospholipase A2 delta	18	93782	2 (0)	1 (0)	0.6	0.03	2.52101
p30
	Apolipoprotein E	303	35901	57 (15)	11 (5)	37.9	1.14	100	100
p20
	Apolipoprotein A-I	323	30597	120 (25)	19 (9)	54.9	1.6	97.561	100
	Actin-related protein 5	31	68315	16 (1)	1 (1)	1.2	0.04	2.43902
p12
	Hemoglobin subunit beta-1	708	15944	53 (24)	11 (8)	83	10.34	48.3178	49.7354
	Hemoglobin subunit beta-2	486	15982	52 (20)	11 (7)	78.9	5.98	27.9439	28.7638
	Apolipoprotein C-III	286	10975	14 (7)	4 (2)	52.5	0.99	4.62617	4.7619
	Hemoglobin subunit alpha	229	15133	34 (11)	7 (3)	50.7	2.31	10.7944	11.1111
	Serum amyloid A-4 protein	149	15136	18 (7)	6 (3)	49.2	0.98	4.57944	4.7138
	Apolipoprotein A-I	55	30597	15 (3)	7 (2)	24.6	0.19	0.88785	0.913901
	Platelet factor 4	47	11464	24 (3)	4 (1)	33.3	0.56	2.61682
	Fibrinogen beta chain	25	55402	5 (2)	2 (1)	3.7	0.05	0.233645
